# Supplementary material for: Hematologic Abnormalities and Diseases Associated with Moderate-to-Marked Basophilia in a Large Cohort of Dogs
Source: MDPI journal article supplement (doi:10.3390/vetsci10120700), 2023-12-12
Supplement: s1 [file s1]

**Table S1.** Frequencies of selected hematologic abnormalities and hypercholesterolemia in patients with marked versus moderate basophilia.

| Abnormalities        | Marked basophilia<br>( <i>n</i> = 65) |          | Moderate basophilia<br>( <i>n</i> = 159) |          |                |
|----------------------|---------------------------------------|----------|------------------------------------------|----------|----------------|
|                      | Proportion                            | <i>n</i> | Proportion                               | <i>n</i> | <i>p</i> value |
| Anemia               | 60%                                   | 39       | 52%                                      | 82       | 0.30           |
| Erythrocytosis       | 2%                                    | 1        | 0%                                       | 0        | 0.29           |
| Thrombocytosis       | 30%                                   | 19       | 15%                                      | 24       | 0.01           |
| Thrombocytopenia     | 22%                                   | 14       | 24%                                      | 38       | 1              |
| Leukocytosis         | 89%                                   | 58       | 81%                                      | 129      | 0.17           |
| Neutrophilia         | 75%                                   | 49       | 61%                                      | 97       | 0.045          |
| Neutropenia          | 3%                                    | 2        | 1%                                       | 2        | 0.58           |
| Eosinophilia         | 46%                                   | 30       | 32%                                      | 51       | 0.07           |
| Monocytosis          | 69%                                   | 45       | 65%                                      | 104      | 0.64           |
| Lymphocytosis        | 9%                                    | 6        | 13%                                      | 20       | 0.65           |
| Hypercholesterolemia | 8%                                    | 5        | 5%                                       | 8        | 0.53           |

**Table S2.** Frequencies of selected hematologic abnormalities and hypercholesterolemia in the basophilia group with and without concurrent eosinophilia.

| Abnormalities        | With concurrent<br>eosinophilia ( <i>n</i> = 81) |          | Without concurrent<br>eosinophilia ( <i>n</i> = 143) |          |                |
|----------------------|--------------------------------------------------|----------|------------------------------------------------------|----------|----------------|
|                      | Proportion                                       | <i>n</i> | Proportion                                           | <i>n</i> | <i>p</i> value |
| Anemia               | 38%                                              | 31       | 63%                                                  | 90       | 0.0005         |
| Erythrocytosis       | 1%                                               | 1        | 0%                                                   | 0        | 0.36           |
| Thrombocytosis       | 12%                                              | 10       | 23%                                                  | 33       | 0.049          |
| Thrombocytopenia     | 22%                                              | 18       | 24%                                                  | 34       | 0.87           |
| Leukocytosis         | 91%                                              | 74       | 79%                                                  | 113      | 0.02           |
| Neutrophilia         | 57%                                              | 46       | 70%                                                  | 100      | 0.06           |
| Neutropenia          | 0%                                               | 0        | 3%                                                   | 4        | 0.30           |
| Monocytosis          | 58%                                              | 47       | 71%                                                  | 102      | 0.06           |
| Lymphocytosis        | 14%                                              | 11       | 10%                                                  | 15       | 0.51           |
| Hypercholesterolemia | 4%                                               | 3        | 7%                                                   | 10       | 0.38           |

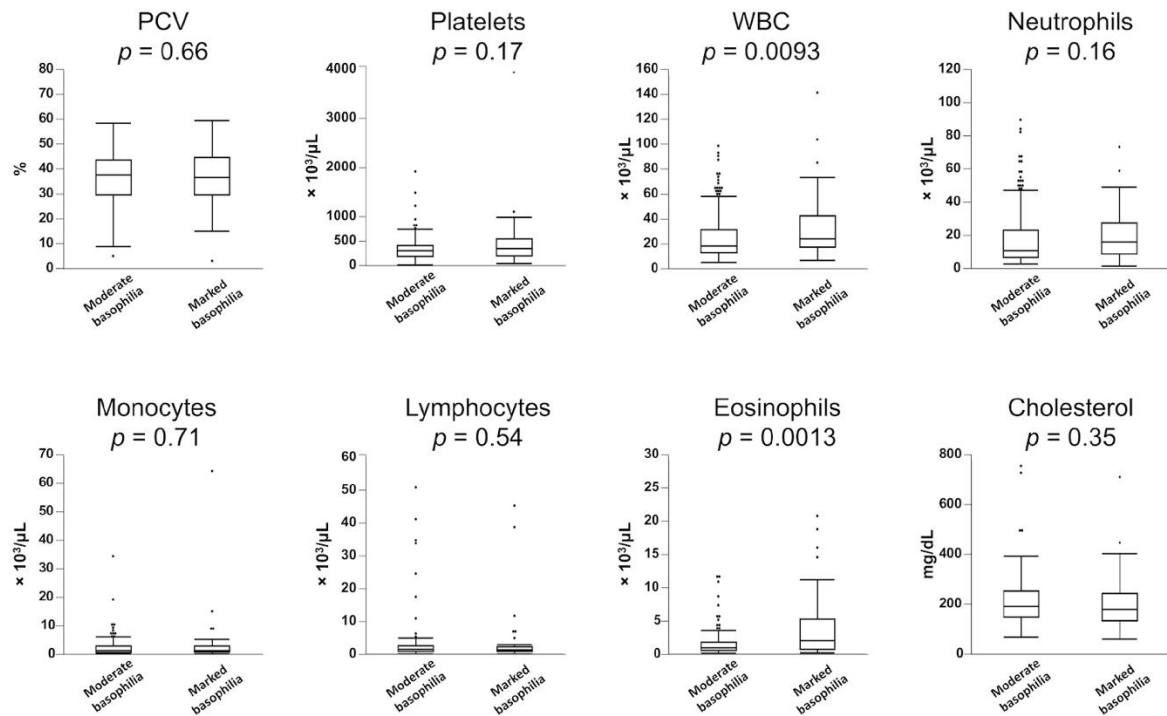

**Figure S1.** Comparison of hematological parameters between the dogs with moderate ( $n = 65$ ) and marked ( $n = 159$ ) basophilia. Box plots indicate 25th to 75th percentiles with whiskers indicating the minimum and maximum values within 1.5 interquartile range and with dots showing outliers.

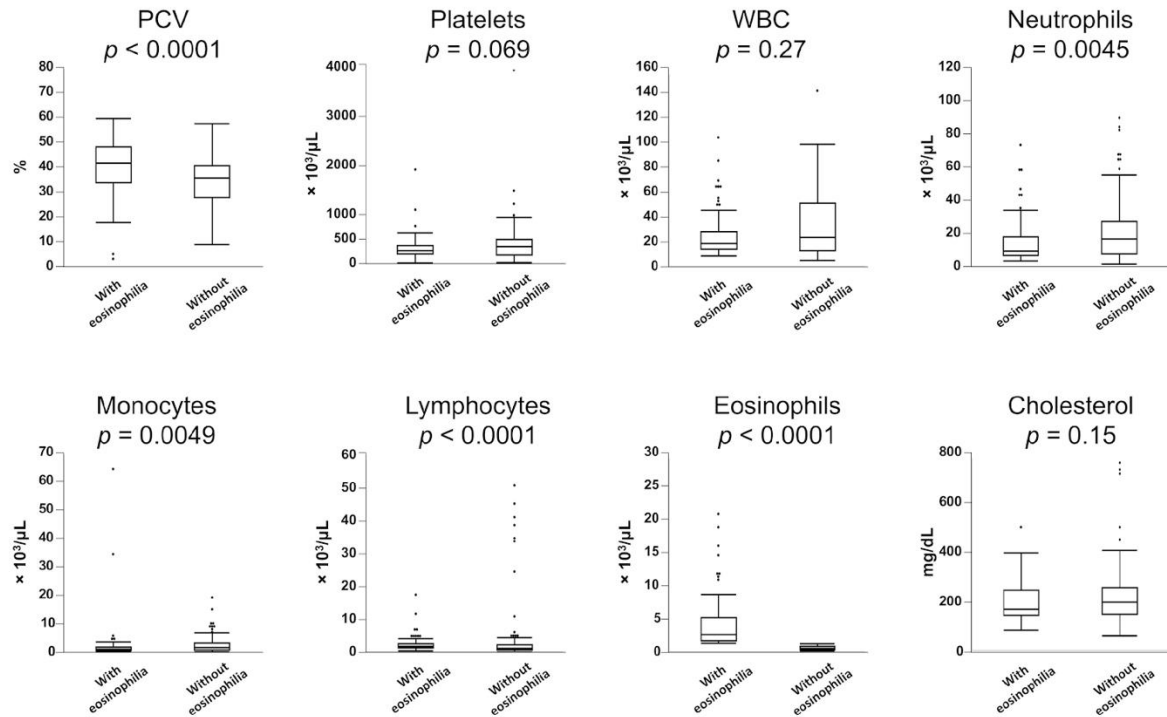

**Figure S2.** Comparison of hematological parameters between the dogs with ( $n = 81$ ) and without concurrent eosinophilia ( $n = 143$ ) in the basophilia group (dogs with moderate and marked basophilia). Box plots indicate 25th to 75th percentiles with whiskers indicating the minimum and maximum values within 1.5 interquartile range and with dots showing outliers.
